# Supplementary material
Source: publisher figshare collection journal article supplement (https://acs.figshare.com/ndownloader/files/24786171)
Supplement: Supplementary file 1 [file 24786171]

**Supporting Information**

**Cerium Pyrazolates Grafted onto Mesoporous Silica SBA-15:  
Reversible CO<sub>2</sub> Uptake and Catalytic Cycloaddition of Epoxides and  
Carbon Dioxide**

Uwe Bayer, Yucang Liang, and Reiner Anwander\*

Institut für Anorganische Chemie, Eberhard Karls Universität Tübingen, Auf der Morgenstelle  
18, 72076 Tübingen, Germany

E-Mail: [reiner.anwander@uni-tuebingen.de](mailto:reiner.anwander@uni-tuebingen.de)

## **Table of Contents**

|                       |            |
|-----------------------|------------|
| PXRD                  | <b>S3</b>  |
| SEM and TEM           | <b>S3</b>  |
| Decomposition Study   | <b>S4</b>  |
| NMR Spectra           | <b>S4</b>  |
| TGA                   | <b>S11</b> |
| Crystallographic Data | <b>S12</b> |
| References            | <b>S14</b> |

### Powder X-Ray Diffraction (PXRD)

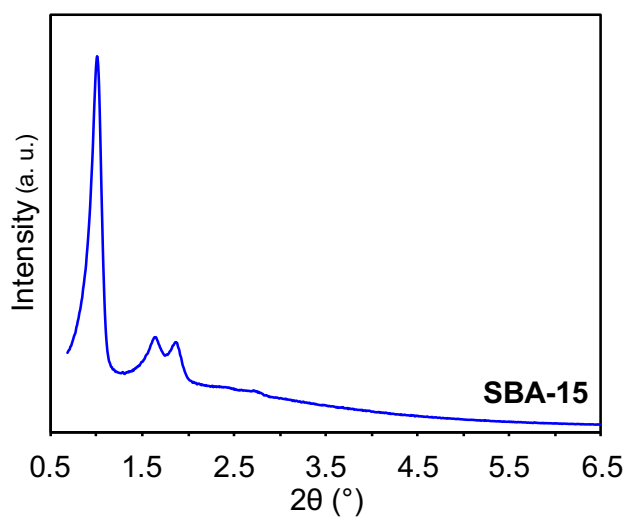

**Figure S1.** Low-angle PXRD pattern of parent SBA-15.

### Scanning/Transmission Electron Microscopy (S/TEM)

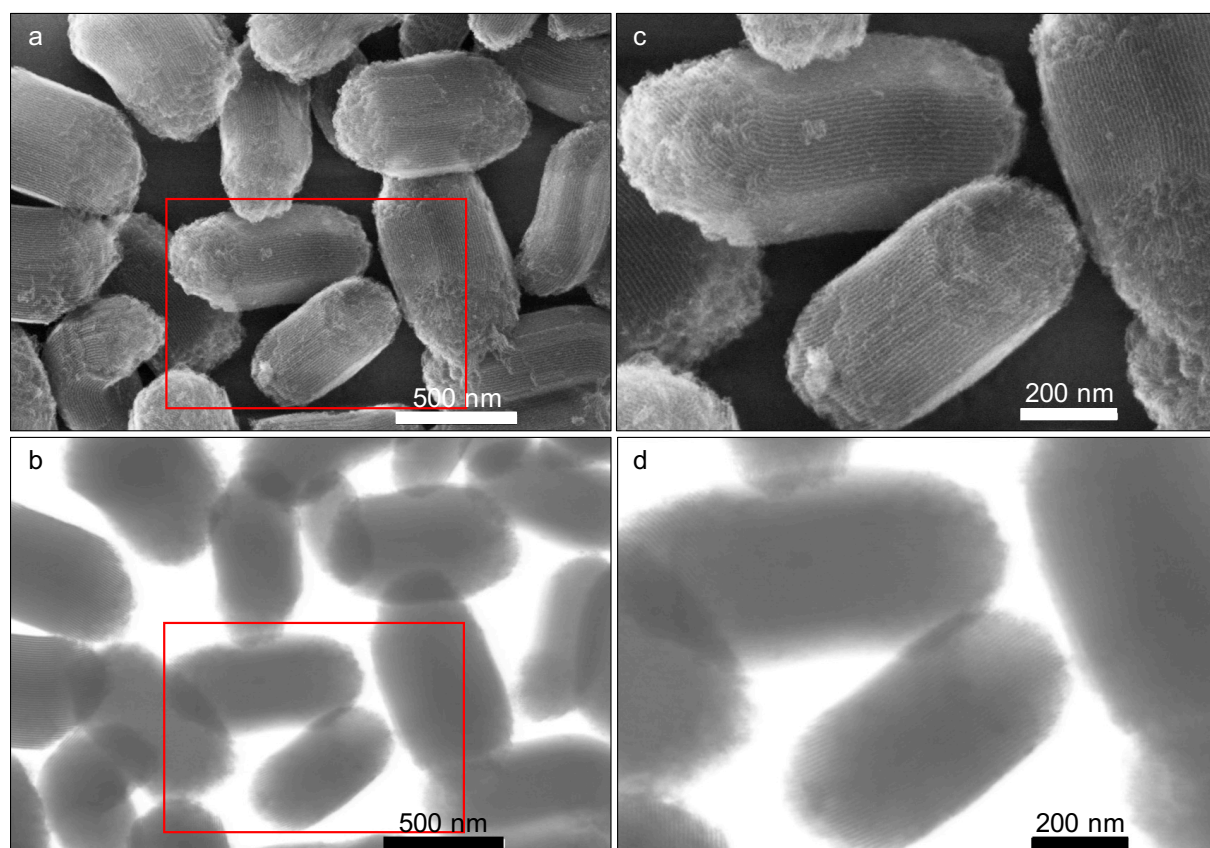

**Figure S2.** SEM (a,c) and TEM (b,d) images of parent SBA-15; (c) and (d) are magnified views of the red-marked areas in (a) and (b), respectively.

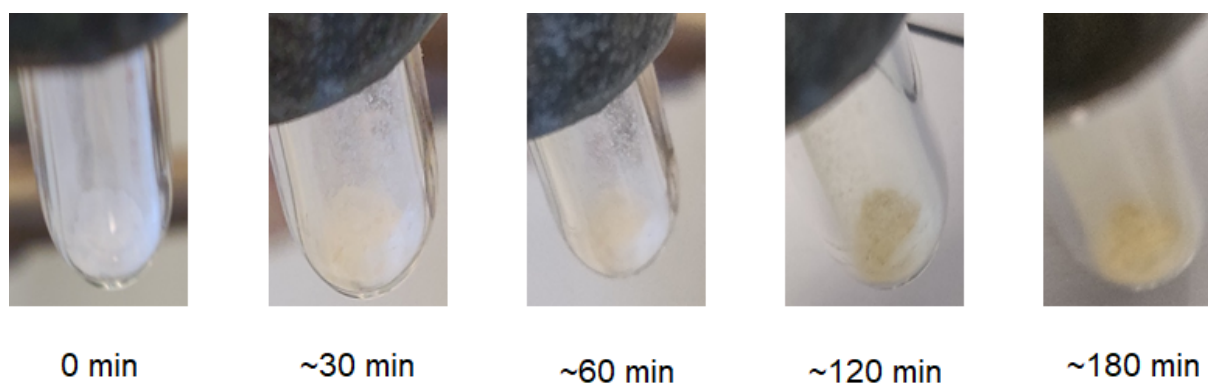

**Figure S3.** Color change during evacuation of a  $[\text{Ce}(\text{Me}_2\text{pz})_3(\text{thf})]_2@ \text{SBA-15}_{500}$  sample at high vacuum ( $p < 9 \cdot 10^{-5}$  mbar) indicating decomposition under reduced pressure.

**NMR Spectra** (solvent signals are marked with \*)

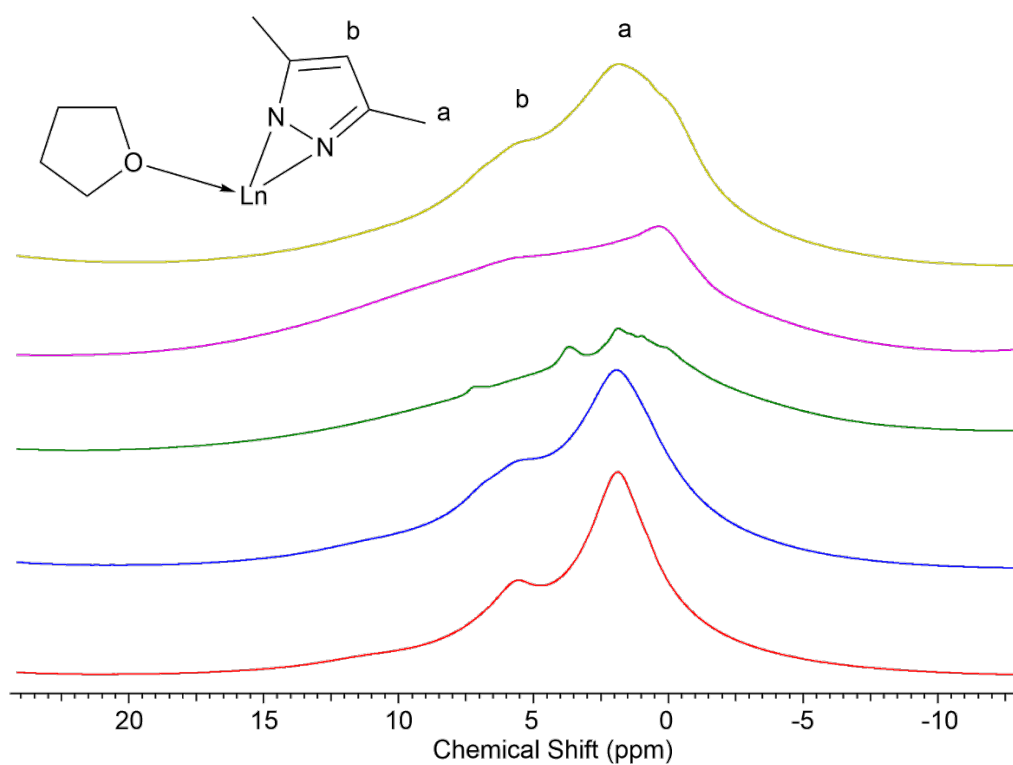

**Figure S4.**  $^1\text{H}$  MAS NMR spectra of  $[\text{Ce}(\text{Me}_2\text{pz})_4]_2@ \text{SBA-15}_{500}$  (**H1**) (red),  $\text{Ce}(\text{Me}_2\text{pz})_4(\text{thf})@ \text{SBA-15}_{500}$  (**H2**) (blue),  $\text{Ce}_4(\text{Me}_2\text{pz})_{12}@ \text{SBA-15}_{500}$  (**H3**) (green),  $[\text{Ce}(\text{Me}_2\text{pz})_3(\text{thf})]_2@ \text{SBA-15}_{500}$  (**H4**) (pink), and  $[\text{La}(\text{Me}_2\text{pz})_3(\text{thf})]_2@ \text{SBA-15}_{500}$  (**H5**) (yellow), from bottom to top.

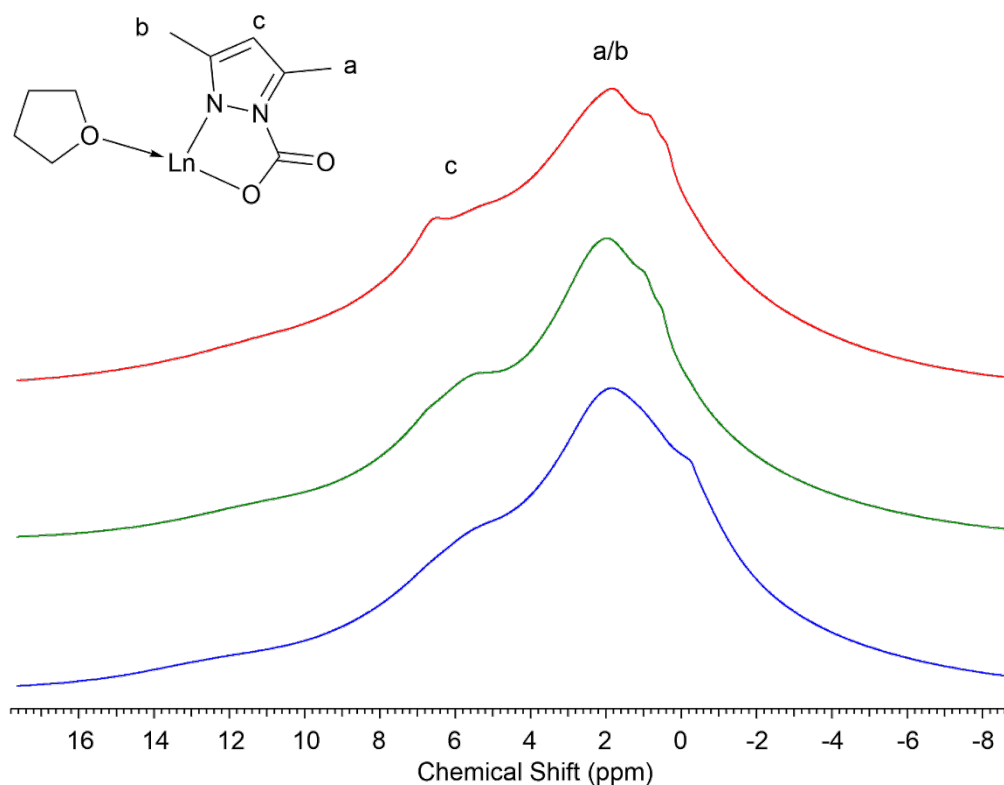

**Figure S5.**  $^1\text{H}$  MAS NMR spectra of  $\text{CO}_2@[\text{Ce}(\text{Me}_2\text{pz})_4]_2@\text{SBA-15}_{500}$  (**H1<sup>CO2</sup>**) (blue),  $\text{CO}_2@\text{Ce}(\text{Me}_2\text{pz})_4(\text{thf})@\text{SBA-15}_{500}$  (**H2<sup>CO2</sup>**) (green), and  $\text{CO}_2@[\text{La}(\text{Me}_2\text{pz})_3(\text{thf})]_2@\text{SBA-15}_{500}$  (**H5<sup>CO2</sup>**) (red) from bottom to top.

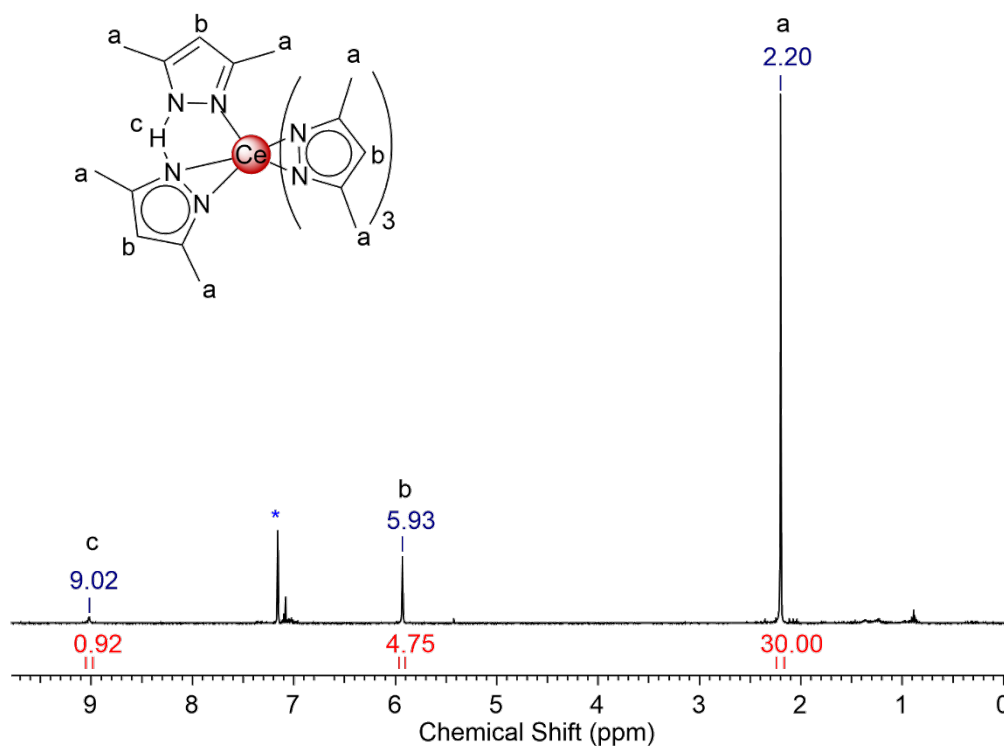

**Figure S6.**  $^1\text{H}$  NMR spectrum ( $\text{C}_6\text{D}_6$ , 400.13 MHz, 26  $^\circ\text{C}$ ) of the non-volatile compounds of the supernatant after grafting of  $\text{Ce}(\text{Me}_2\text{pz})_4(\text{thf})$  (**H2**). The spectrum shows minor impurities of *n*-hexane and toluene. Solvent signal is marked with an asterisk. Signals are in accordance with literature known  $\text{Ce}(\text{Me}_2\text{pz})_4(\text{Me}_2\text{pzH})$ .<sup>1</sup>

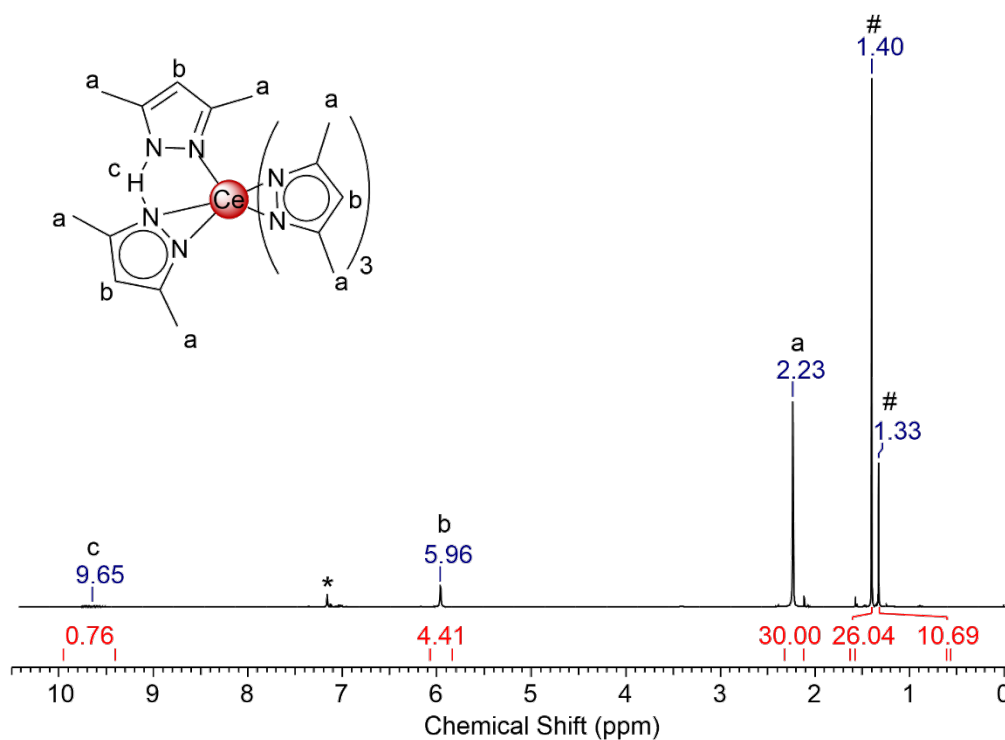

**Figure S7.**  $^1\text{H}$  NMR spectrum ( $\text{C}_6\text{D}_6$ , 400.13 MHz, 26  $^\circ\text{C}$ ) of the reaction mixture of  $[\text{Ce}(\text{Me}_2\text{pz})_4]_2$  and  $\text{HOSi}(\text{OtBu})_3$  yielding  $\text{Ce}(\text{Me}_2\text{pz})_4(\text{Me}_2\text{pzH})$  and an unknown tris-*tert*-butoxysiloxy species (marked with #).

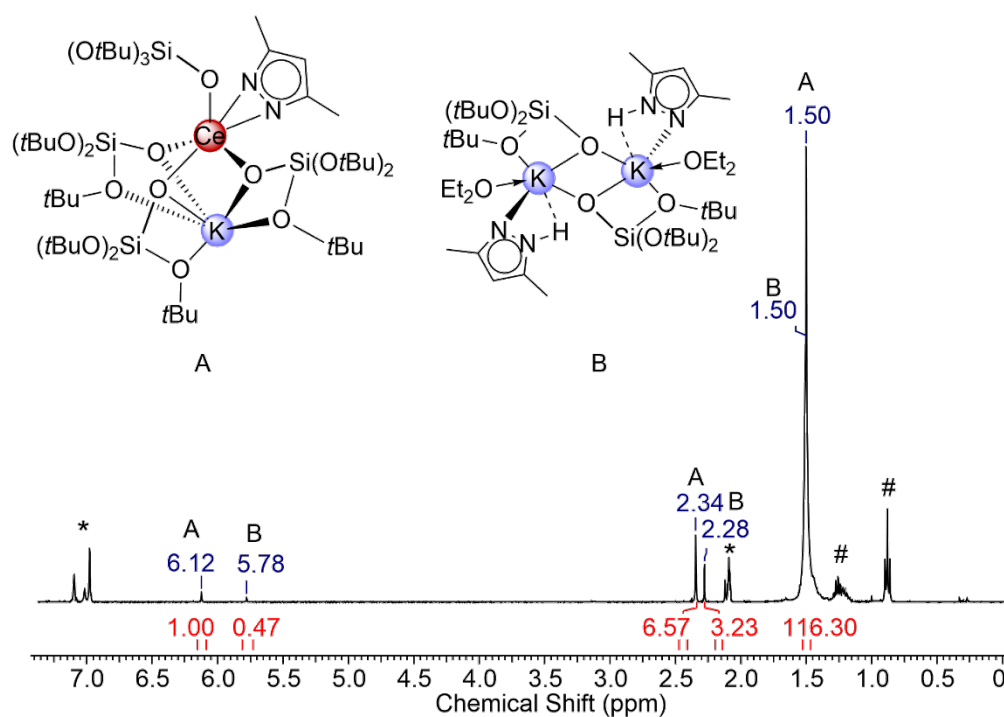

**Figure S8.**  $^1\text{H}$  NMR spectrum (toluene- $d_8$ , 400.13 MHz, 26  $^\circ\text{C}$ ) of a mixture of  $\text{KCe}[\text{OSi}(\text{OBu})_3]_4(\text{Me}_2\text{pz})$  (**6**) and  $\text{K}[\text{OSi}(\text{OtBu})_3](\text{Me}_2\text{pzH})(\text{Et}_2\text{O})$ . Impurities of *n*-pentane are marked with #.

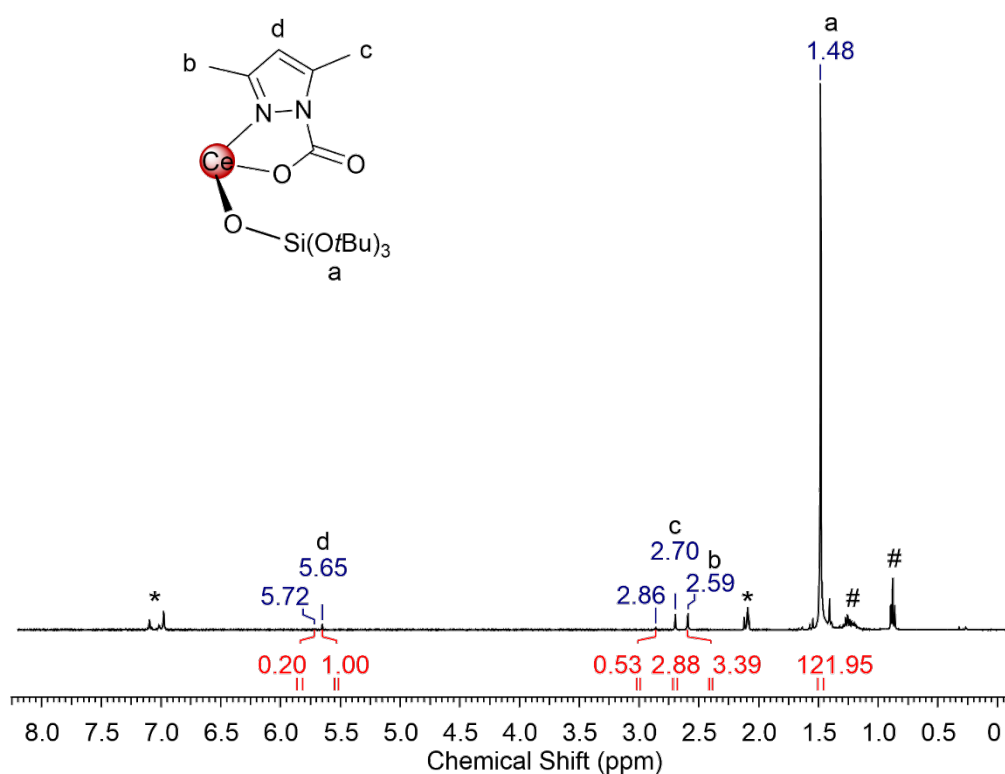

**Figure S9.** <sup>1</sup>H NMR spectrum (toluene-*d*<sub>8</sub>, 400.13 MHz, 26 °C) of the reaction of CO<sub>2</sub> with the mixture KCe[OSi(O*t*Bu)<sub>3</sub>]<sub>4</sub>(Me<sub>2</sub>pz) (**6**)/K[OSi(O*t*Bu)<sub>3</sub>](Me<sub>2</sub>pzH)(Et<sub>2</sub>O). Impurities of *n*-pentane are marked with #.

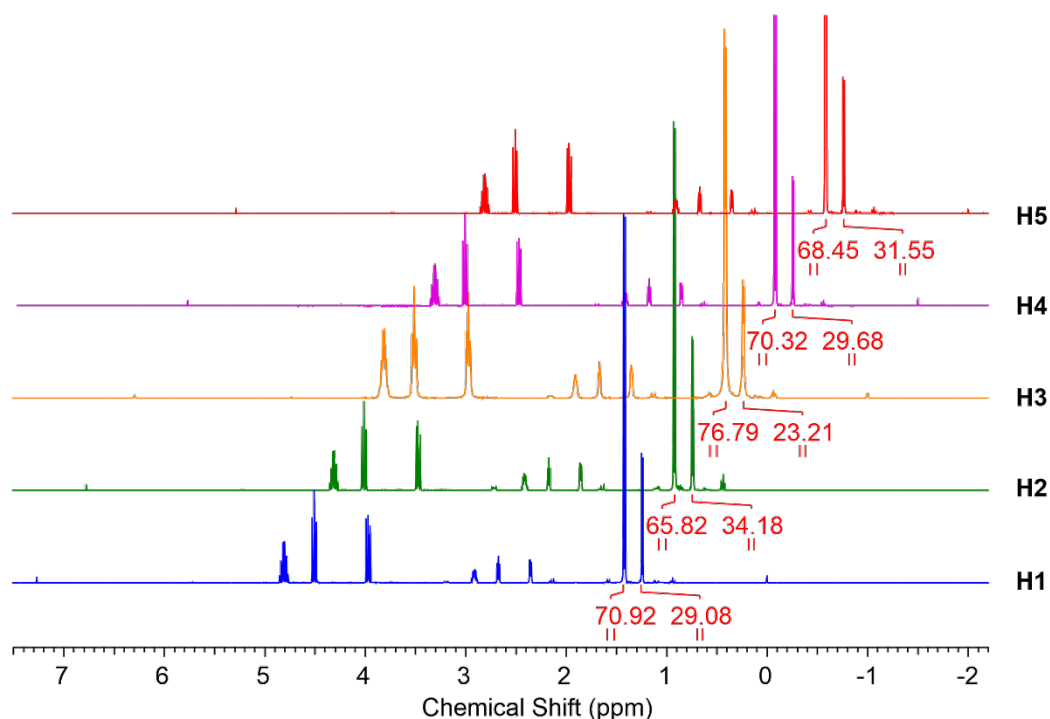

**Figure S10.** Stacked <sup>1</sup>H NMR spectra (CDCl<sub>3</sub>, 400.13 MHz, 26 °C) of the product mixture of the catalytic formation of propylene carbonate using 0.1 mol% of [Ce(Me<sub>2</sub>pz)<sub>4</sub>]<sub>2</sub>@SBA-15<sub>500</sub> (**H1**), Ce(Me<sub>2</sub>pz)<sub>4</sub>(thf)@SBA-15<sub>500</sub> (**H2**), Ce<sub>4</sub>(Me<sub>2</sub>pz)<sub>12</sub>@SBA-15<sub>500</sub> (**H3**), [Ce(Me<sub>2</sub>pz)<sub>3</sub>(thf)]<sub>2</sub>@SBA-15<sub>500</sub> (**H4**), or [La(Me<sub>2</sub>pz)<sub>3</sub>(thf)]<sub>2</sub>@SBA-15<sub>500</sub> (**H5**) and TBAB as a catalyst system. The conversion was determined by the integral ratio of the methyl protons in propylene oxide and propylene carbonate.

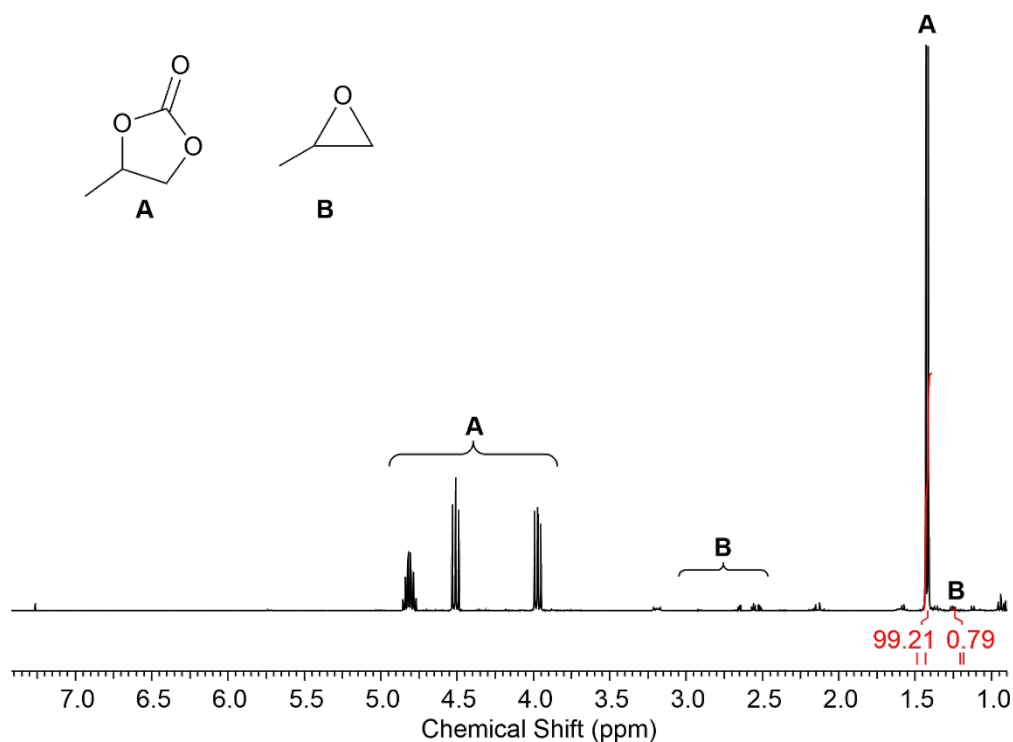

**Figure S11.**  $^1\text{H}$  NMR (26 °C, 400.13 MHz, chloroform- $d$ ) of the product mixture of the catalytic formation of propylene carbonate using 0.5 mol% of  $[\text{Ce}(\text{Me}_2\text{pz})_4]_2@\text{SBA-15}_{500}$  (**H1**) and TBAB as a catalyst system. The conversion was determined by the integral ratio of the methyl protons in propylene oxide and propylene carbonate.

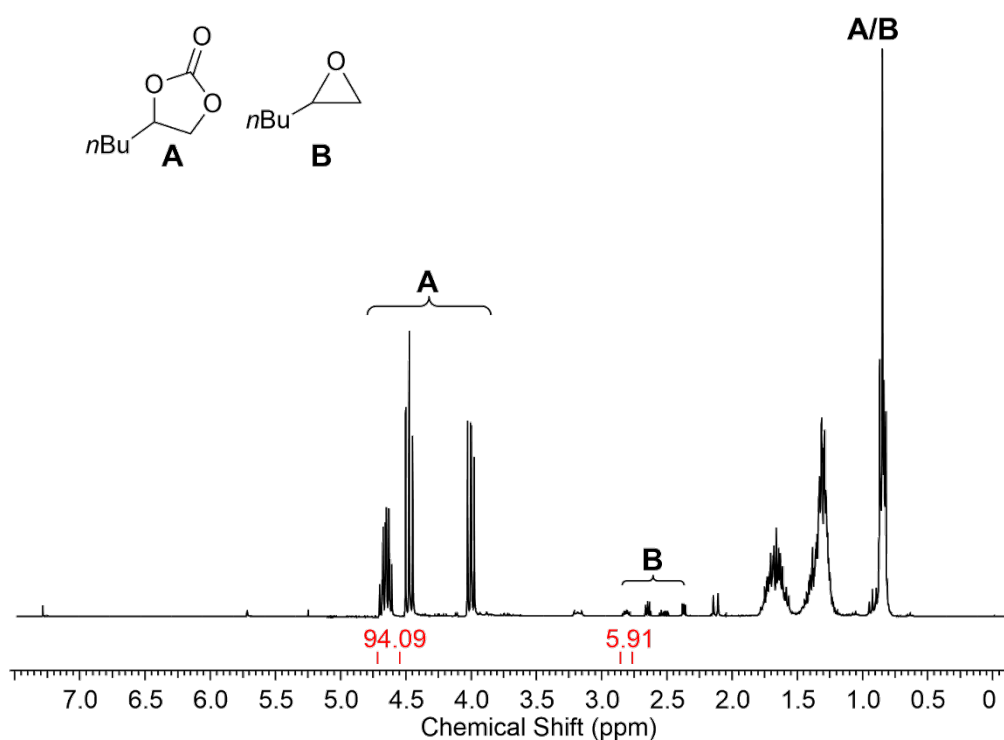

**Figure S12.**  $^1\text{H}$  NMR (26 °C, 400.13 MHz, chloroform- $d$ ) of the product mixture of the catalytic formation of 1,2-*n*-hexylene carbonate using 0.5 mol% of  $[\text{Ce}(\text{Me}_2\text{pz})_4]_2@\text{SBA-15}_{500}$  (**H1**) and TBAB as a catalyst system. The conversion was determined by the integral ratio of the protons in  $\alpha$ -position in 1,2-*n*-hexylene oxide and 1,2-*n*-hexylene carbonate.



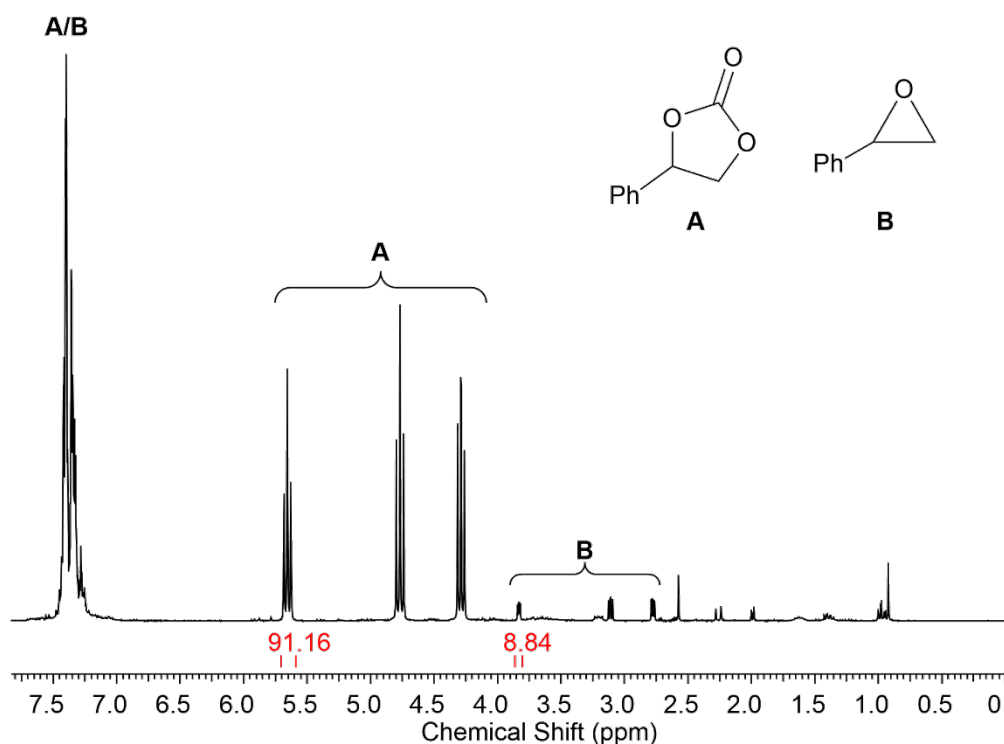

**Figure S13.**  $^1\text{H}$  NMR (26 °C, 400.13 MHz, chloroform- $d$ ) of the product mixture of the catalytic formation of styrene carbonate using 0.5 mol% of  $[\text{Ce}(\text{Me}_2\text{pz})_4]_2@ \text{SBA-15}_{500}$  (**H1**) and TBAB as a catalyst system. The conversion was determined by the integral ratio of the protons in  $\alpha$ -position in styrene oxide and styrene carbonate.

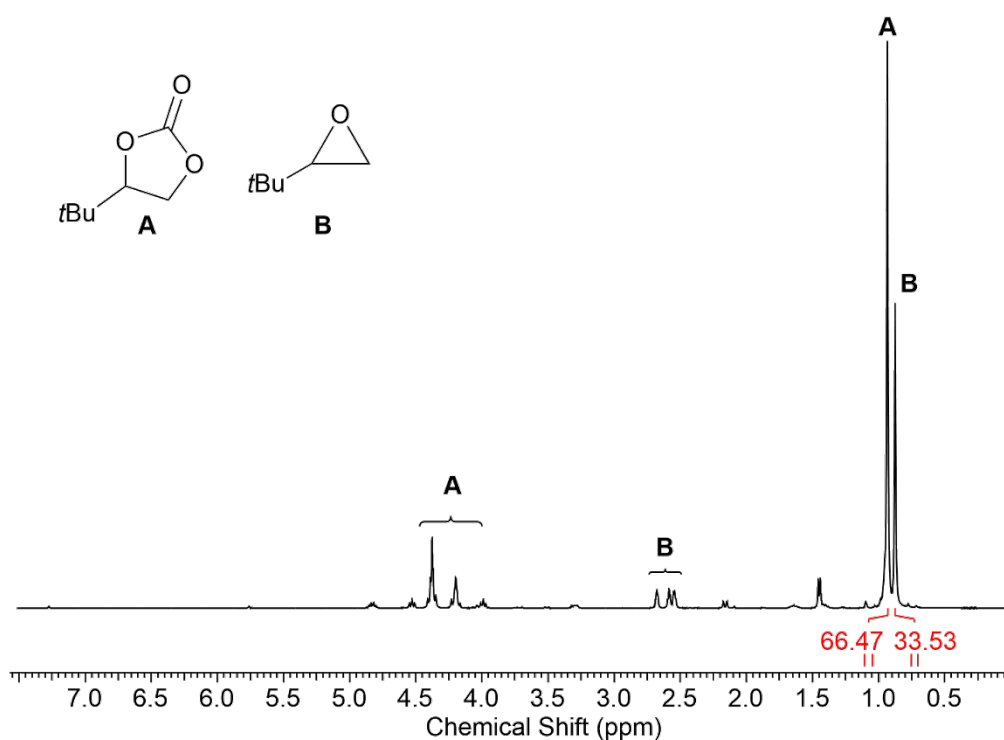

**Figure S14.**  $^1\text{H}$  NMR (26 °C, 400.13 MHz, chloroform- $d$ ) of the product mixture of the catalytic formation of 3,3-dimethyl-1,2-butylene carbonate using 0.5 mol% of  $[\text{Ce}(\text{Me}_2\text{pz})_4]_2@ \text{SBA-15}_{500}$  (**H1**) and TBAB as a catalyst system. The conversion was determined by the integral ratio of the *tert*-butyl protons in 3,3-dimethyl-1,2-butene oxide and 3,3-dimethyl-1,2-butylene carbonate.

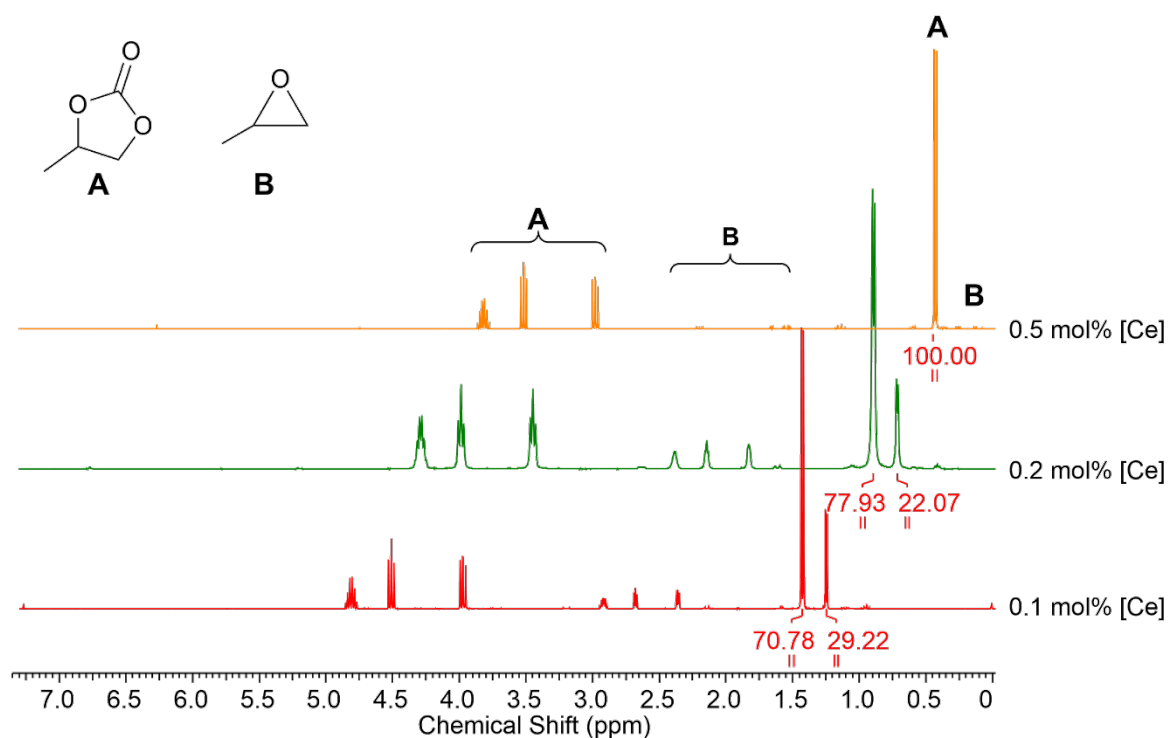

**Figure S15.** Stacked  $^1\text{H}$  NMR spectra (CDCl<sub>3</sub>, 400.13 MHz, 26 °C) of the product mixture of the catalytic formation of propylene carbonate using different amounts of [Ce(Me<sub>2</sub>pz)<sub>4</sub>]<sub>2</sub>@SBA-15<sub>500</sub> (**H1**) and TBAB as a catalyst system. The conversion was determined by the integral ratio of the methyl protons in propylene oxide and propylene carbonate.

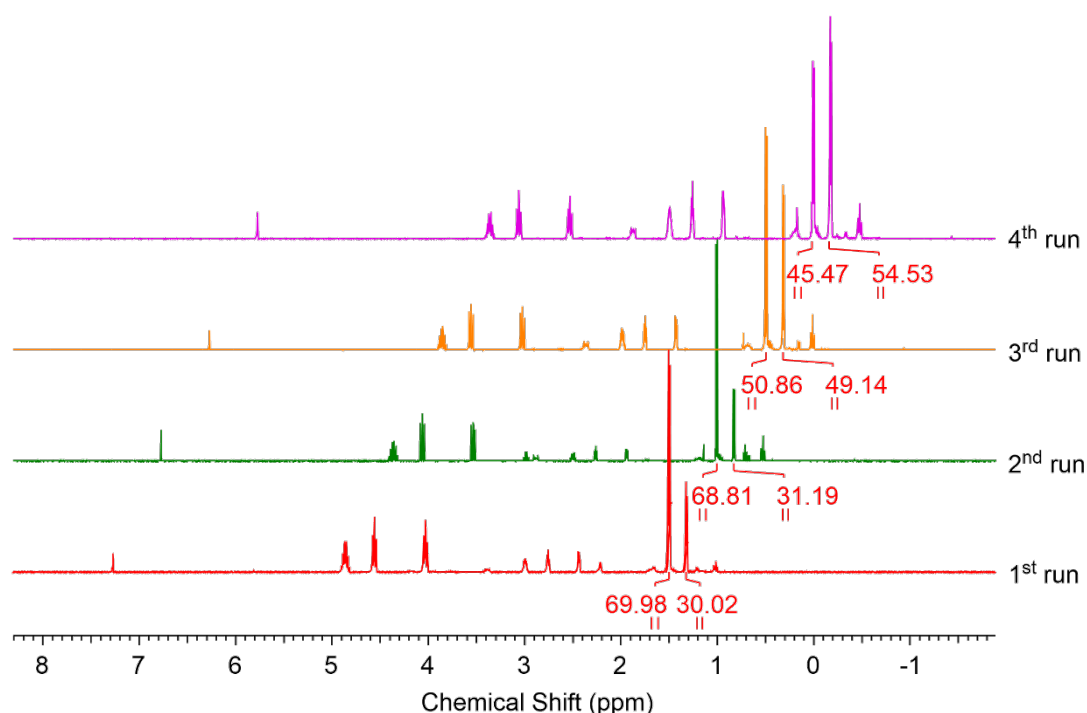

**Figure S16.** Stacked  $^1\text{H}$  NMR spectra (CDCl<sub>3</sub>, 400.13 MHz, 26 °C) of the product mixture of the catalytic formation of propylene carbonate using 0.5 mol% of Ce(Me<sub>2</sub>pz)<sub>4</sub>(thf)@SBA-15<sub>500</sub> (**H2**) and TBAB as a catalyst system. The conversion was determined by the integral ratio of the methyl protons in propylene oxide and propylene carbonate.

TGA

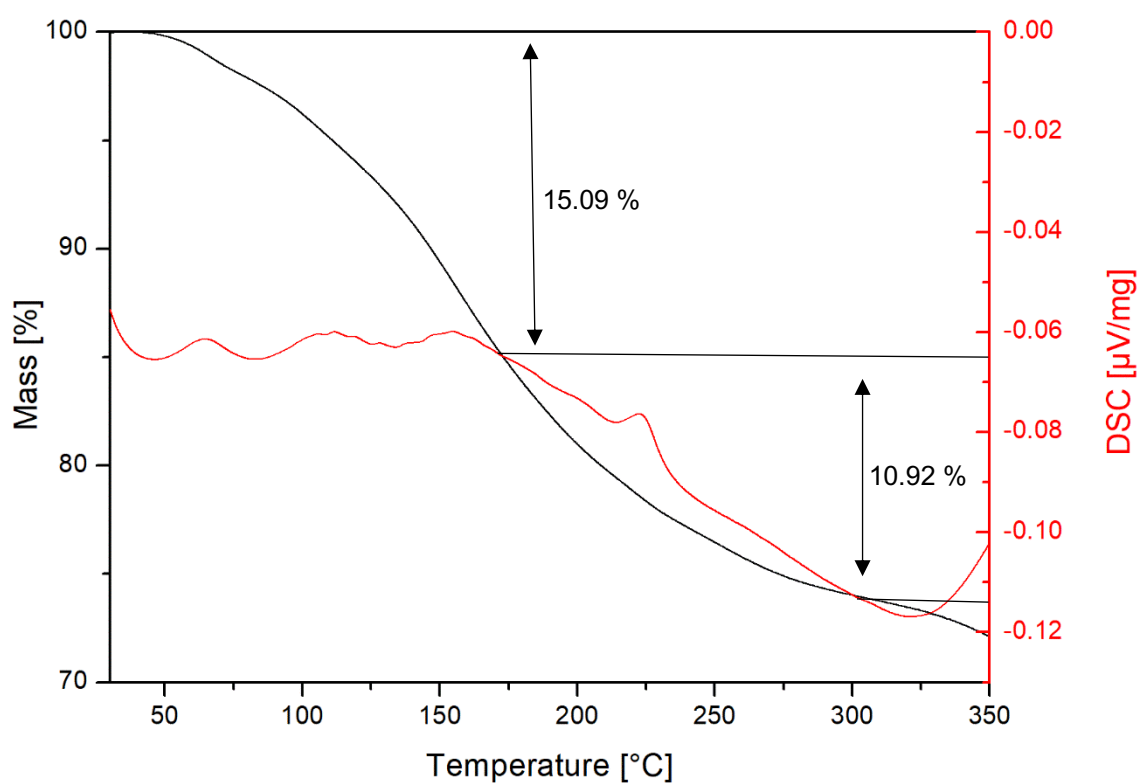

**Figure S17.** Thermogravimetric analysis (red) and differential scanning calorimetry (red) of  $\text{CO}_2@[La(\text{Me}_2\text{pz})_3(\text{thf})]_2@SBA-15_{500}$  ( $\text{H5}^{\text{CO}_2}$ ).

### Crystallographic Data

Crystals for X-ray crystallography were grown using saturated solutions of mixtures of *n*-pentane / Et<sub>2</sub>O (**6** and K[OSi(O*t*Bu)<sub>3</sub>](Me<sub>2</sub>pzH)(Et<sub>2</sub>O)). Suitable crystals for X-ray analysis were handpicked in a glovebox, coated with Parabar 10312 and stored on microscope slides. Data collection was done on a *Bruker* APEX II Duo diffractometer by using QUAZAR optics and Mo K<sub>α</sub> (λ = 0.71073 Å). The data collection strategy was determined using COSMO<sup>2</sup> employing ω scans. Raw data were processed by APEX and SAINT,<sup>3,4</sup> corrections for absorption effects were applied using SADABS.<sup>5</sup> The structures were solved by direct methods and refined against all data by full-matrix least-squares methods on F<sup>2</sup> using SHELXTL and SHELXLE.<sup>6,7</sup> All non-hydrogen atoms were refined anisotropically. Plots were generated by using CCDC Mercury 3.19.1.<sup>8</sup> Further details regarding the refinement and crystallographic data are listed in Table S1 and in the CIF files.

**Table S1.** Crystallographic data for compounds **6** and K[OSi(OtBu)<sub>3</sub>](Me<sub>2</sub>pzH)(Et<sub>2</sub>O)

|                                                    | <b>6</b>                                                                           | K[OSi(OtBu) <sub>3</sub> ](Me <sub>2</sub> pzH)(Et <sub>2</sub> O)                            |
|----------------------------------------------------|------------------------------------------------------------------------------------|-----------------------------------------------------------------------------------------------|
| <b>CCDC</b>                                        | 2023873                                                                            | 2023872                                                                                       |
| <b>formula</b>                                     | C <sub>53</sub> H <sub>115</sub> CeKN <sub>2</sub> O <sub>16</sub> Si <sub>4</sub> | C <sub>42</sub> H <sub>90</sub> K <sub>2</sub> N <sub>4</sub> O <sub>10</sub> Si <sub>2</sub> |
| <b>M [g·mol<sup>-1</sup>]</b>                      | 1328.04                                                                            | 945.55                                                                                        |
| <b>λ [Å]</b>                                       | 0.71073                                                                            | 0.71073                                                                                       |
| <b>color</b>                                       | orange-yellow                                                                      | colorless                                                                                     |
| <b>crystal dimensions [mm]</b>                     | 0.379 × 0.254 × 0.114                                                              | 0.512 × 0.299 × 0.292                                                                         |
| <b>crystal system</b>                              | monoclinic                                                                         | triclinic                                                                                     |
| <b>space group</b>                                 | P2 <sub>1</sub> /n                                                                 | P $\bar{1}$                                                                                   |
| <b>a [Å]</b>                                       | 16.7561(7)                                                                         | 11.5002(5)                                                                                    |
| <b>b [Å]</b>                                       | 19.8676(9)                                                                         | 12.0299(5)                                                                                    |
| <b>c [Å]</b>                                       | 21.7572(9)                                                                         | 12.7116(5)                                                                                    |
| <b>α [°]</b>                                       | 90                                                                                 | 115.5620(10)                                                                                  |
| <b>β [°]</b>                                       | 98.9390(10)                                                                        | 96.0850(10)                                                                                   |
| <b>γ [°]</b>                                       | 90                                                                                 | 113.5980(10)                                                                                  |
| <b>V [Å<sup>3</sup>]</b>                           | 7155.1(5)                                                                          | 1368.67(10)                                                                                   |
| <b>Z</b>                                           | 4                                                                                  | 1                                                                                             |
| <b>F(000)</b>                                      | 2832                                                                               | 516                                                                                           |
| <b>T [K]</b>                                       | 100(2)                                                                             | 100(2)                                                                                        |
| <b>ρ<sub>calcd</sub> [g·cm<sup>-3</sup>]</b>       | 1.233                                                                              | 1.147                                                                                         |
| <b>μ[mm<sup>-1</sup>]</b>                          | 0.818                                                                              | 0.268                                                                                         |
| <b>Data / restraints / parameters</b>              | 20044 / 18 / 732                                                                   | 9093 / 0 / 288                                                                                |
| <b>Goodness of fit</b>                             | 1.038                                                                              | 1.042                                                                                         |
| <b>R<sub>1</sub> (I &gt; 2σ (I))<sup>[a]</sup></b> | 0.0281                                                                             | 0.0289                                                                                        |
| <b>ωR<sub>2</sub> (all data)<sup>[b]</sup></b>     | 0.0719                                                                             | 0.0808                                                                                        |

<sup>[a]</sup>  $R_1 = \sum (|F_0| - |F_c|) / \sum |F_0|$ ,  $F_0 > 4s(F_0)$ .  $\omega R_2 = \{\sum [w(F_0 - F_c)^2] / \sum [w(F_0)^2]\}^{1/2}$

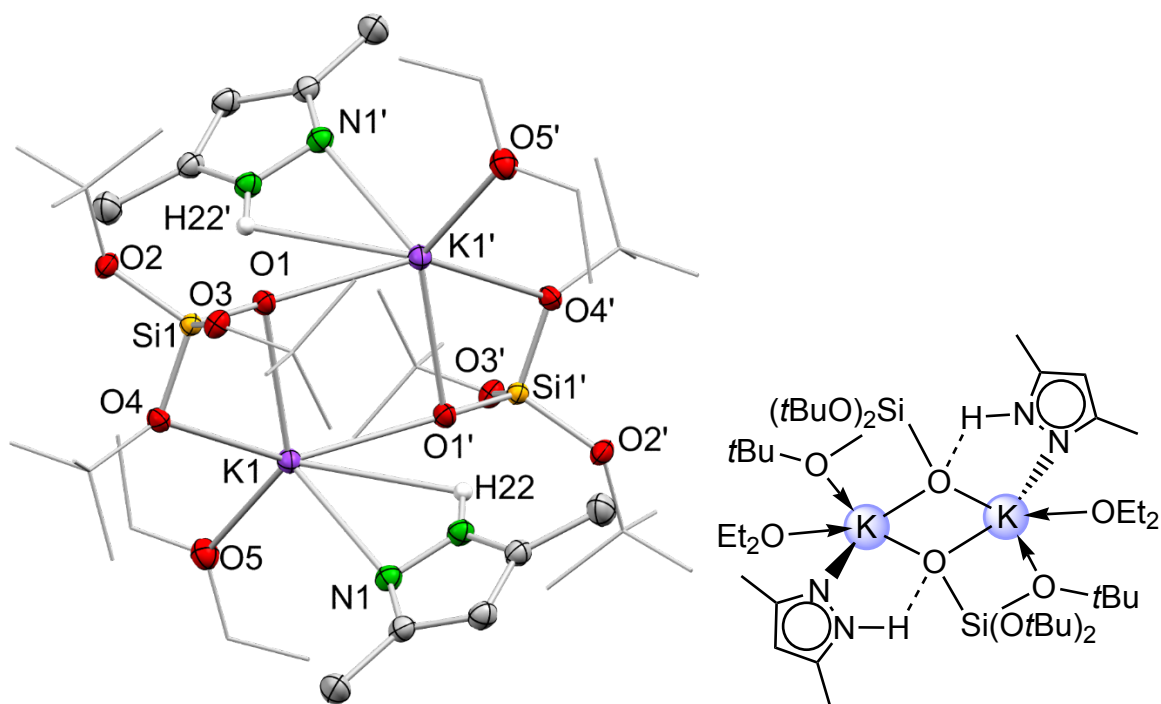

**Figure S18.** Crystal structure and structural representation of  $\text{K}[\text{OSi}(\text{O}t\text{Bu})_3](\text{Me}_2\text{pzH})(\text{Et}_2\text{O})$ . Ellipsoids are shown at the 50% probability level. Hydrogen atoms are omitted for clarity. Selected bond lengths [Å]: K1–O1 2.7686(6), K1–O4 2.7338(6), K1–O1' 2.6308(6), K1–N1 2.8604(7), K1–H22 2.902(14).

## References

- (1) Werner, D.; Bayer, U.; Schädle, D.; Anwender, R. Emergence of a New [NNN] Pincer Ligand via Si-H-Bond Activation and  $\beta$ -Hydride Abstraction at Tetravalent Cerium. *Chem. - Eur. J.* **2020**, *26*, 12194–12205.
- (2) COSMO, v. 1.61; Bruker AXS Inc.: Madison, WI, **2012**.
- (3) APEX 3, v. 2016.5-0; Bruker AXS Inc.: Madison, WI, **2012**.
- (4) SAINT, v. 8.34A; Bruker AXS Inc.: Madison, WI, **2012**.
- (5) Krause, L.; Herbst-Irmer, R.; Sheldrick, G. M.; Stalke, D. Comparison of Silver and Molybdenum Microfocus X-Ray Sources for Single-Crystal Structure Determination. *J. Appl. Crystallogr.* **2015**, *48*, 3–10.
- (6) Sheldrick, G. M. SHELXT – Integrated Space-Group and Crystal-Structure Determination. *Acta Crystallogr. Sect. Found. Adv.* **2015**, *71*, 3–8.
- (7) Hübschle, C. B.; Sheldrick, G. M.; Dittrich, B. *ShelXle*: A Qt Graphical User Interface for SHELXL. *J. Appl. Crystallogr.* **2011**, *44*, 1281–1284.
- (8) Macrae, C. F.; Bruno, I. J.; Chisholm, J. A.; Edgington, P. R.; McCabe, P.; Pidcock, E.; Rodriguez-Monge, L.; Taylor, R.; van de Streek, J.; Wood, P. A. Mercury CSD 2.0 – New Features for the Visualization and Investigation of Crystal Structures. *J. Appl. Crystallogr.* **2008**, *41*, 466–470.
